# Supplementary material for: The Metabolic Syndrome and Risk of Sudden Cardiac Death: The Atherosclerosis Risk in Communities Study
Source: PubMed Central journal article supplement — J Am Heart Assoc. 2017 Aug 23;6(8):e006103. doi: 10.1161/JAHA.117.006103 (PMC5586451; doi:10.1161/jaha.117.006103), 2017-08-23
Supplement: JAH3-6-e006103-s001.pdf [file JAH3-6-e006103-s001.pdf]

# **SUPPLEMENTAL MATERIAL**

**Table S1.** Baseline Participant Characteristics Stratified by Field Center

| <b>Characteristic</b>                                            | <b>Total<br/>(N=13168)</b> | <b>Forsyth County, NC<br/>(N=3430)</b> | <b>Jackson, MS<br/>(N=2904)</b> | <b>Minneapolis, MN<br/>(N=3530)</b> | <b>Washington County,<br/>MD<br/>(N=3304)</b> | <b>P-Value</b> |
|------------------------------------------------------------------|----------------------------|----------------------------------------|---------------------------------|-------------------------------------|-----------------------------------------------|----------------|
| Age, median (25 <sup>th</sup> , 75 <sup>th</sup> percentiles), y | 54 (49, 59)                | 54 (49, 59)                            | 52 (48, 58)                     | 53 (49, 58)                         | 55 (50, 59)                                   | <.001          |
| Female sex, %                                                    | 56.0                       | 55.2                                   | 61.8                            | 53.2                                | 54.7                                          | <.001          |
| Race, %                                                          |                            |                                        |                                 |                                     |                                               | <.001          |
| African American                                                 | 24.8                       | 10.7                                   | 100.0                           | 0.0                                 | 0.0                                           |                |
| Caucasian                                                        | 75.2                       | 89.3                                   | 0.0                             | 100.0                               | 100.0                                         |                |
| <b>Metabolic syndrome components</b>                             |                            |                                        |                                 |                                     |                                               |                |
| Waist Circumference, in                                          | 96.0 (87.0, 104.0)         | 95.0 (86.0, 103.0)                     | 97.0 (88.0, 107.0)              | 94.0 (85.0, 103.0)                  | 97.0 (89.0, 106.0)                            | <.001          |
| Fasting Blood Glucose, mmol/L                                    | 5.5 (5.1, 5.9)             | 5.4 (5.1, 5.8)                         | 5.6 (5.1, 6.1)                  | 5.5 (5.2, 5.9)                      | 5.5 (5.1, 5.9)                                | <.001          |
| Systolic Blood Pressure, mm Hg                                   | 118 (108, 131)             | 116 (105, 128)                         | 125 (115, 140)                  | 117 (107, 128)                      | 117 (107, 128)                                | <.001          |
| Diastolic Blood Pressure, mm Hg                                  | 73 (66, 80)                | 69 (63, 76)                            | 80 (73, 87)                     | 73 (67, 80)                         | 71 (65, 78)                                   | <.001          |
| Serum Triglycerides mmol/L                                       | 1.2 (0.9, 1.7)             | 1.3 (0.9, 1.8)                         | 1.0 (0.8, 1.4)                  | 1.2 (0.9, 1.7)                      | 1.3 (1.0, 1.9)                                | <.001          |
| HDL mmol/L                                                       | 1.3 (1.0, 1.6)             | 1.2 (1.0, 1.6)                         | 1.4 (1.1, 1.7)                  | 1.3 (1.0, 1.6)                      | 1.2 (1.0, 1.5)                                | <.001          |
| <b>Comorbidities, %</b>                                          |                            |                                        |                                 |                                     |                                               |                |
| Atrial Fibrillation                                              | 0.1                        | 0.1                                    | 0.0                             | 0.1                                 | 0.2                                           | 0.411          |
| Diabetes                                                         | 7.5                        | 6.3                                    | 12.8                            | 4.2                                 | 7.4                                           | <.001          |
| Current Smoker                                                   | 25.2                       | 29.7                                   | 28.0                            | 21.8                                | 21.8                                          | <.001          |

| <b>Characteristic</b>                                                                                                                                                                                                      | <b>Total<br/>(N=13168)</b> | <b>Forsyth County, NC<br/>(N=3430)</b> | <b>Jackson, MS<br/>(N=2904)</b> | <b>Minneapolis, MN<br/>(N=3530)</b> | <b>Washington County,<br/>MD<br/>(N=3304)</b> | <b>P-Value</b> |
|----------------------------------------------------------------------------------------------------------------------------------------------------------------------------------------------------------------------------|----------------------------|----------------------------------------|---------------------------------|-------------------------------------|-----------------------------------------------|----------------|
| <b>Laboratory values</b>                                                                                                                                                                                                   |                            |                                        |                                 |                                     |                                               |                |
| Sodium                                                                                                                                                                                                                     | 141.0 (139.0, 142.0)       | 141.0 (139.0, 143.0)                   | 141.0 (140.0, 143.0)            | 141.0 (139.0, 142.0)                | 141.0 (139.0, 142.0)                          | <.001          |
| Potassium                                                                                                                                                                                                                  | 4.4 (4.1, 4.7)             | 4.4 (4.2, 4.7)                         | 4.2 (3.9, 4.5)                  | 4.7 (4.4, 5.0)                      | 4.4 (4.1, 4.6)                                | <.001          |
| Creatinine                                                                                                                                                                                                                 | 1.1 (1.0, 1.2)             | 1.1 (0.9, 1.2)                         | 1.1 (1.0, 1.2)                  | 1.1 (1.0, 1.2)                      | 1.1 (1.0, 1.2)                                | <.001          |
| Magnesium                                                                                                                                                                                                                  | 1.6 (1.5, 1.7)             | 1.6 (1.6, 1.7)                         | 1.6 (1.5, 1.7)                  | 1.7 (1.6, 1.8)                      | 1.6 (1.6, 1.7)                                | <.001          |
| Body Mass Index                                                                                                                                                                                                            | 26.7 (23.9, 30.2)          | 25.5 (23.0, 28.5)                      | 28.6 (25.4, 32.6)               | 26.3 (23.7, 29.4)                   | 26.9 (24.0, 30.3)                             | <.001          |
| LVH by Cornell - Left Ventricular Hypertrophy                                                                                                                                                                              | 1.9%                       | 1.2%                                   | 5.3%                            | 0.8%                                | 0.8%                                          | <.001          |
| Resting Heart Rate                                                                                                                                                                                                         | 66 (60, 73)                | 66 (60, 73)                            | 65 (59, 73)                     | 65 (60, 72)                         | 66 (60, 73)                                   | <.001          |
| <b>Medications, %</b>                                                                                                                                                                                                      |                            |                                        |                                 |                                     |                                               |                |
| Beta-Blockers                                                                                                                                                                                                              | 4.2                        | 3.3                                    | 3.9                             | 5.0                                 | 4.4                                           | 0.003          |
| Angiotensin-converting enzyme inhibitors                                                                                                                                                                                   | 2.6                        | 2.3                                    | 3.0                             | 2.4                                 | 2.8                                           | 0.180          |
| Antiarrhythmic Drugs                                                                                                                                                                                                       | 0.4                        | 0.3                                    | 0.4                             | 0.3                                 | 0.6                                           | 0.091          |
| <b>Abbreviations: ECG, electrocardiogram; HDL, high-density lipoprotein; NC, North Carolina; MS, Mississippi; MN, Minnesota; MD, Maryland. Data are based on participants with available data for each characteristic.</b> |                            |                                        |                                 |                                     |                                               |                |
